# Supplementary material for: Socioeconomic status indicators and common mental disorders: Evidence from a study of prenatal depression in Pakistan
Source: PubMed Central journal article supplement — SSM Popul Health. 2017 Oct 31;4:1–9. doi: 10.1016/j.ssmph.2017.10.004 (PMC5769091; doi:10.1016/j.ssmph.2017.10.004), 2017-10-31
Supplement: mmc1.pdf [file mmc1.pdf]

**Supplemental Table 1. Polychoric correlations between assets**

|                | Farm  | Animals | Radio | Television | Fridge | Washing Mch. | Water pump | Bed  | Chair | Cabinet | Clock | Sofa | Sewing Mch. | Camera | Computer | Wrist-watch | Car/ Truck | Gas Cylinder | Flush Toilet | Roof Material | Wall Material | Floor Material |
|----------------|-------|---------|-------|------------|--------|--------------|------------|------|-------|---------|-------|------|-------------|--------|----------|-------------|------------|--------------|--------------|---------------|---------------|----------------|
| Farm           |       |         |       |            |        |              |            |      |       |         |       |      |             |        |          |             |            |              |              |               |               |                |
| Animals        | 0.53  |         |       |            |        |              |            |      |       |         |       |      |             |        |          |             |            |              |              |               |               |                |
| Radio          | 0.18  | 0.11    |       |            |        |              |            |      |       |         |       |      |             |        |          |             |            |              |              |               |               |                |
| Television     | 0.21  | 0.16    | 0.18  |            |        |              |            |      |       |         |       |      |             |        |          |             |            |              |              |               |               |                |
| Fridge         | 0.47  | 0.32    | 0.23  | 0.55       |        |              |            |      |       |         |       |      |             |        |          |             |            |              |              |               |               |                |
| Washing Mch.   | 0.29  | 0.15    | 0.25  | 0.55       | 0.67   |              |            |      |       |         |       |      |             |        |          |             |            |              |              |               |               |                |
| Water pump     | 0.37  | 0.17    | 0.20  | 0.42       | 0.62   | 0.51         |            |      |       |         |       |      |             |        |          |             |            |              |              |               |               |                |
| Bed            | 0.41  | 0.22    | 0.26  | 0.49       | 0.57   | 0.63         | 0.43       |      |       |         |       |      |             |        |          |             |            |              |              |               |               |                |
| Chair          | 0.53  | 0.25    | 0.18  | 0.26       | 0.50   | 0.44         | 0.40       | 0.75 |       |         |       |      |             |        |          |             |            |              |              |               |               |                |
| Cabinet        | 0.37  | 0.16    | 0.21  | 0.49       | 0.63   | 0.64         | 0.42       | 0.77 | 0.67  |         |       |      |             |        |          |             |            |              |              |               |               |                |
| Clock          | 0.30  | 0.22    | 0.39  | 0.37       | 0.53   | 0.60         | 0.34       | 0.56 | 0.46  | 0.63    |       |      |             |        |          |             |            |              |              |               |               |                |
| Sofa           | 0.46  | 0.27    | 0.21  | 0.49       | 0.67   | 0.64         | 0.47       | 0.81 | 0.65  | 0.73    | 0.61  |      |             |        |          |             |            |              |              |               |               |                |
| Sewing Mch.    | 0.22  | 0.21    | 0.33  | 0.48       | 0.51   | 0.54         | 0.35       | 0.41 | 0.31  | 0.48    | 0.67  | 0.53 |             |        |          |             |            |              |              |               |               |                |
| Camera         | 0.18  | 0.05    | 0.46  | 0.32       | 0.60   | 0.44         | 0.39       | 0.49 | 0.45  | 0.51    | 0.57  | 0.53 | 0.64        |        |          |             |            |              |              |               |               |                |
| Computer       | 0.19  | 0.07    | 0.29  | 0.35       | 0.58   | 0.59         | 0.46       | 0.44 | 0.50  | 0.63    | 0.53  | 0.58 | 0.59        | 0.62   |          |             |            |              |              |               |               |                |
| Wrist-watch    | 0.21  | 0.16    | 0.36  | 0.30       | 0.46   | 0.46         | 0.38       | 0.36 | 0.38  | 0.41    | 0.61  | 0.44 | 0.52        | 0.63   | 0.66     |             |            |              |              |               |               |                |
| Car/ Truck     | 0.21  | -0.02   | 0.11  | 0.33       | 0.42   | 0.39         | 0.37       | 0.35 | 0.28  | 0.35    | 0.26  | 0.30 | 0.30        | 0.46   | 0.39     | 0.27        |            |              |              |               |               |                |
| Gas Cylinder   | -0.01 | -0.27   | 0.14  | 0.26       | 0.35   | 0.47         | 0.29       | 0.33 | 0.19  | 0.39    | 0.47  | 0.34 | 0.33        | 0.33   | 0.46     | 0.38        | 0.27       |              |              |               |               |                |
| Flush Toilet   | 0.22  | 0.06    | 0.14  | 0.38       | 0.50   | 0.50         | 0.50       | 0.35 | 0.16  | 0.39    | 0.33  | 0.37 | 0.35        | 0.29   | 0.42     | 0.28        | 0.32       | 0.40         |              |               |               |                |
| Roof Material  | 0.11  | -0.06   | 0.12  | 0.20       | 0.33   | 0.34         | 0.24       | 0.30 | 0.29  | 0.25    | 0.13  | 0.34 | 0.16        | 0.23   | 0.31     | 0.19        | 0.32       | 0.29         | 0.33         |               |               |                |
| Wall Material  | 0.16  | -0.06   | 0.12  | 0.42       | 0.37   | 0.40         | 0.30       | 0.25 | 0.20  | 0.21    | 0.29  | 0.33 | 0.30        | 0.22   | 0.20     | 0.25        | 0.23       | 0.29         | 0.32         | 0.70          |               |                |
| Floor Material | 0.09  | 0.10    | 0.25  | 0.36       | 0.38   | 0.30         | 0.29       | 0.36 | 0.26  | 0.34    | 0.43  | 0.37 | 0.33        | 0.32   | 0.32     | 0.38        | 0.21       | 0.22         | 0.27         | 0.03          | 0.42          |                |

**Supplemental Table 2 . Unweighted Polyserial and Polychoric Correlations between SES variables**

| Covariates              |                     | Coeff. | Standard Error | P-value |
|-------------------------|---------------------|--------|----------------|---------|
| Standardized Assest SES | Family Debt         | -0.228 | 0.032          | <0.001  |
|                         | Food security       | 0.401  | 0.034          | <0.001  |
|                         | Husband's education | 0.475  | 0.024          | <0.001  |
|                         | Woman's education   | 0.555  | 0.021          | <0.001  |
| Family Debt             | Food security       | -0.184 | 0.046          | <0.001  |
|                         | Husband's education | -0.116 | 0.035          | 0.001   |
|                         | Woman's education   | -0.144 | 0.035          | <0.001  |
| Food security           | Husband's education | 0.250  | 0.041          | <0.001  |
|                         | Woman's education   | 0.268  | 0.040          | <0.001  |
| Husband's education     | Woman's education   | 0.511  | 0.024          | <0.001  |
